# Supplementary material for: Berberine-Encapsulated Poly(lactic-co-glycolic acid)–Hydroxyapatite (PLGA/HA) Microspheres Synergistically Promote Bone Regeneration with DOPA-IGF-1 via the IGF-1R/PI3K/AKT/mTOR Pathway
Source: MDPI journal article supplement (doi:10.3390/ijms242015403), 2023-10-20

**Supplementary materials for**

**Berberine-Encapsulated Poly(lactic-co-glycolic acid)–Hydroxyapatite (PLGA/HA) Microspheres Synergistically Promote Bone Regeneration with DOPA-IGF-1 via the IGF-1R/PI3K/AKT/mTOR Pathway**

**Li Chen <sup>1</sup>, Meng Tian <sup>1</sup>, Jing Yang <sup>1</sup> and Zhenxu Wu <sup>2,\*</sup>**

<sup>1</sup> Key Laboratory of Molecular Epigenetics of Ministry of Education, Institute of Cytology and Genetics, Northeast Normal University, 5268 Renmin Street, Changchun 130024, China; chen166@nenu.edu.cn (L.C.); tianm132@nenu.edu.cn (M.T.); yangj357@nenu.edu.cn (J.Y.)

<sup>2</sup> Key Laboratory of Polymer Ecomaterials, Changchun Institute of Applied Chemistry, Chinese Academy of Sciences, 5625 Renmin Street, Changchun 130022, China

\* Correspondence: wzx131@ciac.ac.cn; Tel.: +86-0431-8526-2390

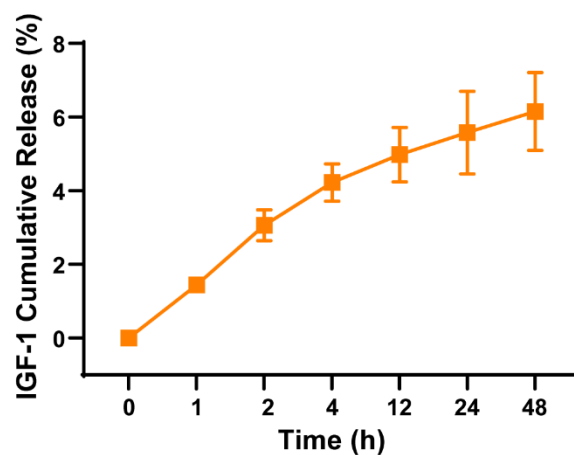

**Figure S1.** IGF-1 (100 ng) cumulative release profiles for 0, 1, 2, 4, 12, 24 and 48 h.

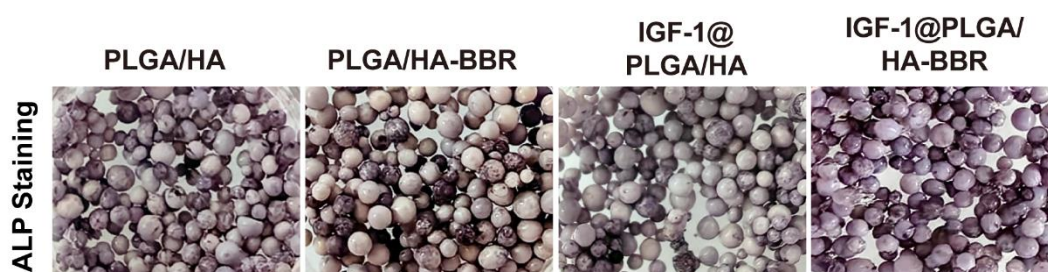

**Figure S2.** ALP staining of MC3T3-E1 cells on different sets of microspheres (7 days).

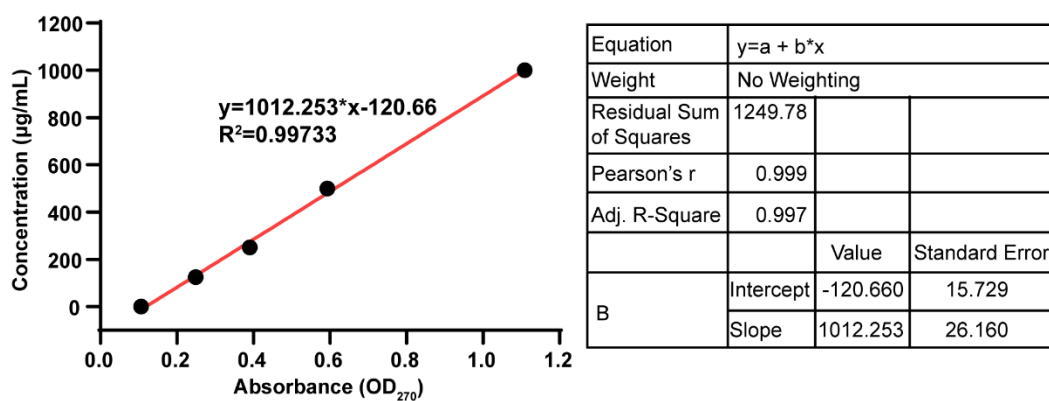

**Figure S3.** Standard curve for determination of BBR solution concentrations. The standard curve is plotted using the absorbance values of the BBR solution at 270 nm for different concentrations. On the left is the diagram of the standard curve and on the right are the specific parameters of the curve.

**Table S1.** Detection of adhesion efficiency of IGF-1 (100 ng).

| Initial amout | adhesion amount (ng) | Non-adhesion amount (ng) | Adhesion efficiency |
|---------------|----------------------|--------------------------|---------------------|
| 100           | 90.28 ± 0.18         | 9.722 ± 0.176            | 90.278%             |

**Table S2.** Sphericity of microspheres.

| Sample            | Sphericity      |
|-------------------|-----------------|
| PLGA/HA           | 0.9630 ± 0.0168 |
| PLGA/HA-BBR       | 0.9551 ± 0.0359 |
| IGF-1@PLGA/HA     | 0.9527 ± 0.0344 |
| IGF-1@PLGA/HA-BBR | 0.9517 ± 0.0218 |

**Table S3.** Primer information for RT-PCR.

| Gene               | Forward primer sequence (5'-3') | Reverse primer sequence (3'-5') |
|--------------------|---------------------------------|---------------------------------|
| <i>Col1</i>        | CCCAGCGGTGGTTATGACTT            | TCGATCCAGTACTCTCCGCT            |
| <i>Runx2</i>       | GCCAGTAATCTTCGTGCCAG            | TAGTGAGCTTCTTCCTGGGGA           |
| <i>Spp1</i> (OPN)  | CCAGCCAAGGACCAACTACA            | AGTGTTTGCTGTAATGCGCC            |
| <i>Bglap</i> (OCN) | AAGCAGGAGGGCAATAAGGT            | TTTGTAGGCGGTCTTCAAGC            |
| <i>Gapdh</i>       | CTTGTGCAGTGCCAGCCTC             | GATGGTGATGGGTTTCCCGT            |

**Table S4.** Information of antibody used in this study.

| Antibody Name    | Manufacturer   | Cat#      | Source/Isotype | MW (kDa) |
|------------------|----------------|-----------|----------------|----------|
| p-mTOR (Ser2448) | Cell Signaling | 5536      | Rabbit         | 289      |
| mTOR             | Cell Signaling | 2983      | Rabbit         | 289      |
| p-AKT (S473)     | Cell Signaling | 9271S     | Rabbit         | 60       |
| AKT              | Cell Signaling | 9272S     | Rabbit         | 60       |
| IGF1R            | Invitrogen     | MA5-13817 | Rabbit         | 155      |
| β-Actin          | Abclonal       | AC026     | Rabbit         | 42       |

## Full Western Blots

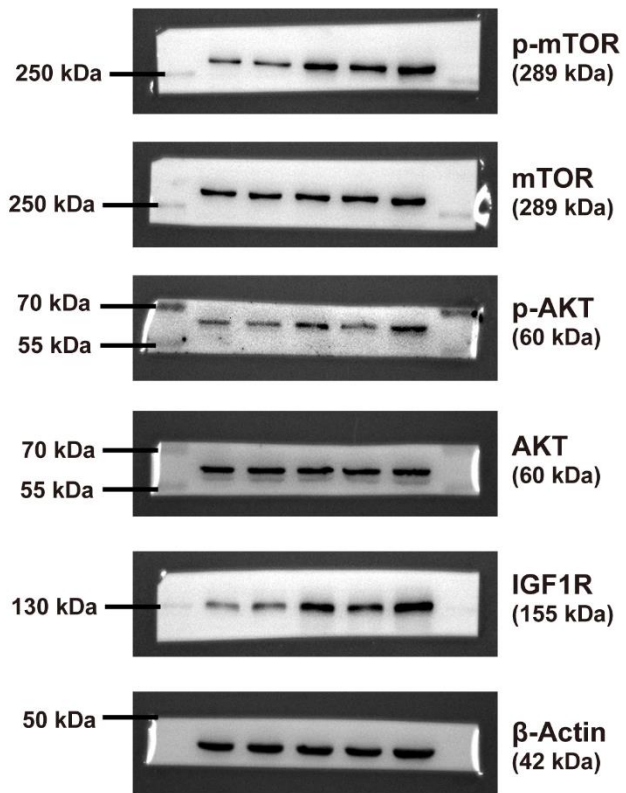

Supplement: s1 [file s1]
